# Supplementary material
Source: ML conference proceedings conference paper supplement (https://www.ecva.net/papers/eccv_2022/papers_ECCV/html/136830480_ECCV_2022_paper.php)
Supplement: Supplementary file 1 [file 136830480-supp.pdf]

# Bayesian Optimization with Clustering and Rollback for CNN Auto Pruning (Supplementary Material)

Hanwei Fan<sup>1,2</sup>, Jiandong Mu<sup>2</sup>, and Wei Zhang<sup>2</sup>

<sup>1</sup> The Hong Kong University of Science and Technology (Guangzhou)

<sup>2</sup> The Hong Kong University of Science and Technology  
{hfanah, jmu}@connect.ust.hk, wei.zhang@ust.hk

## 1 Analysis of the Choice of $C^*$

This document support our paper by providing a detailed analysis of the choice of the bridge stage  $C^*$  on MobileNetV2.

In this experiment, we divide the layers into 6 clusters and then perform the gradual rollback with different  $C^*$ . Table 1 shows the top-1 mean and variance the results. Our proposed gradual rollback method consistently outperforms the direct rollback method, showing its superiority. Although the results of different choices of  $C^*$  are slightly different, the performance is fairly robust when the choice of  $C^*$  is reasonable. Based on our experience, we recommend choosing  $C^*$  to be 2.5 times the cluster number  $C$ . Note that if the recommended  $C^*$  is larger than the original dimensionality  $N$ , there should be no need to use gradual rollback as  $N$  is not high enough.

| $C^*$  | top-1 $m$ | top-1 $\sigma$ |
|--------|-----------|----------------|
| 12     | 52.89     | 0.77           |
| 13     | 52.89     | 0.75           |
| 14     | 53.02     | 0.94           |
| 15     | 53.01     | 0.88           |
| 16     | 52.97     | 0.97           |
| 17     | 52.96     | 0.89           |
| Direct | 52.86     | 0.61           |

Table 1: Performance of different choices of  $C^*$ .
